# Supplementary material for: Construction of high-performance circularly polarized multiple-resonance thermally activated delayed fluorescence materials via the structural optimization of peripheral groups
Source: Royal Society of Chemistry journal article supplement (doi:10.1039/d3tc02191b), 2023-01-01
Supplement: d3tc02191b1.pdf [file d3tc02191b1.pdf]

## Supporting Information

### **Construction of high-performance circular polarization multiple resonance thermal activated delayed fluorescence materials via structural optimization of peripheral groups**

*Wenjing Li<sup>1</sup>, Qixin Lv<sup>1</sup>, Chengxi Sun<sup>1</sup>, Junyuan Deng<sup>1</sup>, Cefeng Zhou<sup>1</sup>, Yewen Zhang<sup>1</sup>,  
Ping Li<sup>1\*</sup>, and Runfeng Chen<sup>1,2\*</sup>*

<sup>1</sup> *State Key Laboratory of Organic Electronics and Information Displays & Institute of Advanced Materials (IAM), Nanjing University of Posts & Telecommunications, Nanjing 210023, P. R. China*

<sup>2</sup> *School of Materials Science and Engineering, Zhejiang Sci-Tech University, Hangzhou 310018, P. R. China*

E-mails: iamrfchen@njupt.edu.cn

## Contents

**Figure S1.** Diagram of geometry comparisons between  $S_0$  and  $S_1$  states together with the calculated RMSD values.

**Figure S2.** Calculated frontier molecular orbital energy levels and electron distributions of the peripheral groups.

**Figure S3.** Simulated emission spectra of the investigated molecules.

**Figure S4.** Charge density differences between  $S_1$  and  $S_0$  of the investigated molecules.

**Figure S5.** Calculated Huang-Rhys factors versus the normal mode frequencies for the investigated molecules.

**Figure S6.** Calculated reorganization energies versus the normal-mode frequencies of QAO-PhDPA and QAO-PhAz.

**Figure S7.** Calculated  $\varphi_1$ ,  $\theta_{\mu,m}$  and  $g_{\text{abs}}$  for the molecules with the electron-donating/withdrawing groups with introducing different steric hindrance groups.

**Figure S8.** Calculated vertical excitation energies and the SOC constants between  $S_1$  and  $T_n$  states of the investigated molecules.

**Table S1.** Calculated HOMO energy levels, the maximum absorption and emission wavelengths of QAO-PhCz with different DFT functionals.

**Table S2.** Transition characteristics of the molecules with electron-donating units using PBE0 and M062X functionals.

**Table S3.** Calculated the maximum absorption and emission wavelengths, transition compositions and reorganization energies of the investigated molecules.

**Table S4.** Calculated  $k_r$ ,  $k_{nr}$ ,  $\theta_{\mu,m}$ ,  $g_{\text{PL}}$  and  $FM$  of the investigated molecules modified with the steric hindrance groups.

**Table S5.** Summary of the PLQY,  $|g_{\text{PL}}|$  and  $FM$  values of the reported CP-MR-TADF materials.

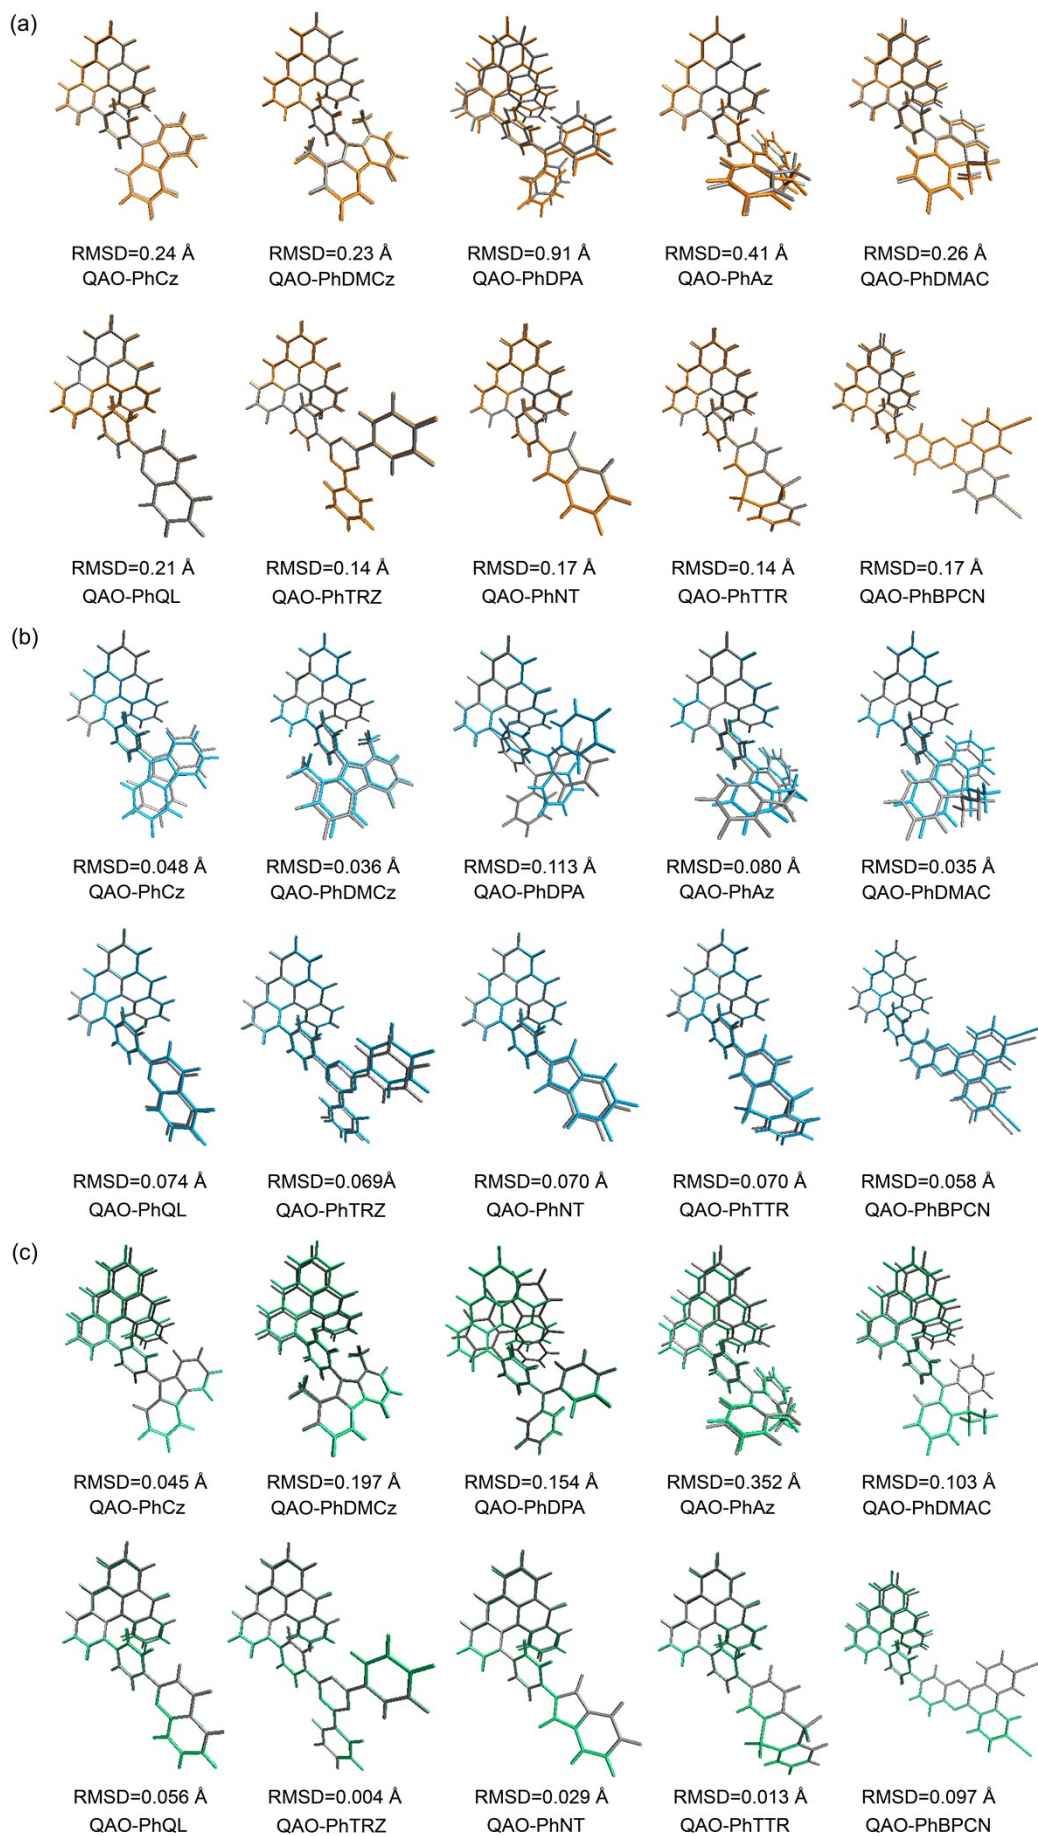

**Figure S1.** Diagram of geometry comparisons between  $S_0$  and  $S_1$  states together with the calculated RMSD values for (a) the investigated molecules (the structures at  $S_0$  and  $S_1$  state are depicted in orange and silver, respectively), (b) the QAO part (the structures at  $S_0$  and  $S_1$  state are depicted in blue and silver, respectively), and (c) the phenyl-linked electron-donating/withdrawing groups (the structures at  $S_0$  and  $S_1$  state are depicted in green and silver, respectively).

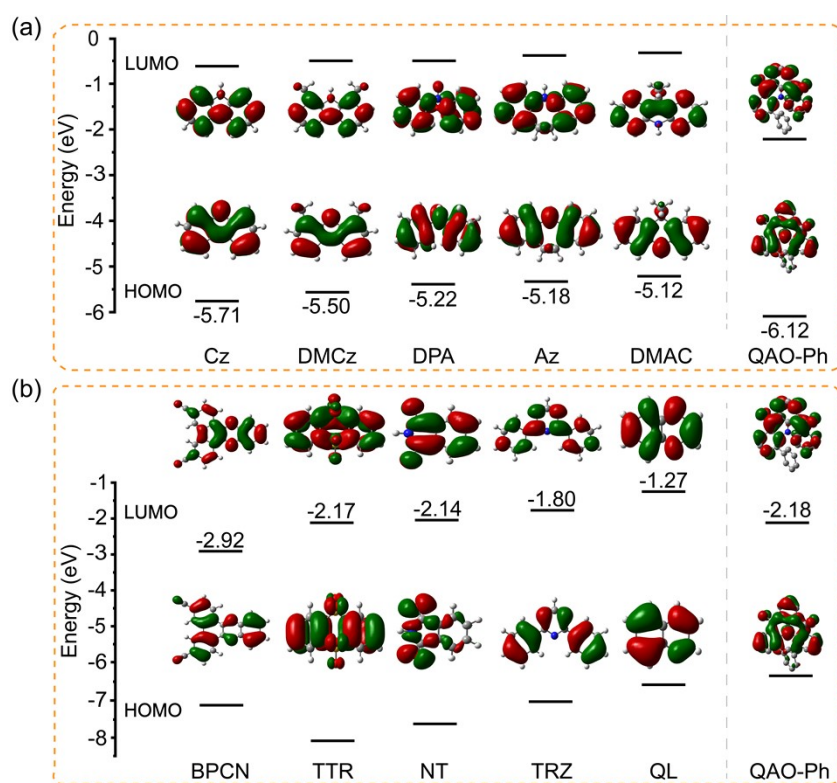

**Figure S2.** Calculated frontier molecular orbital (FMO) energy levels and FMO distributions of (a) the electron-donating and (b) the electron-withdrawing peripheral groups.

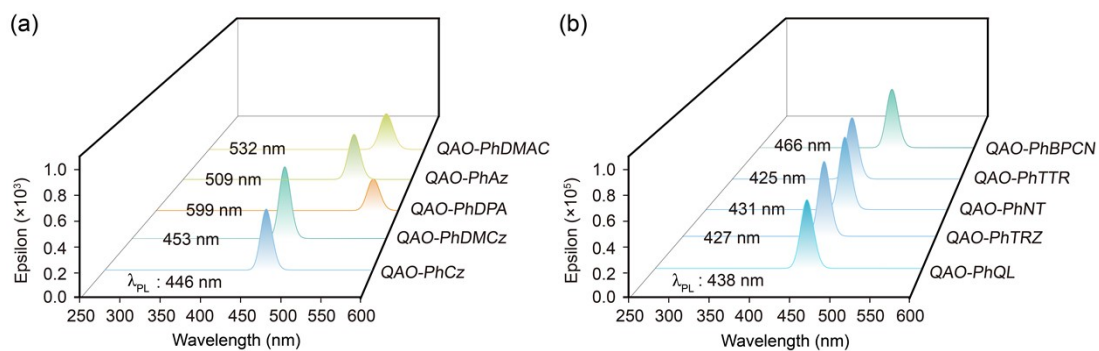

**Figure S3** Simulated emission spectra of the molecules with (a) the electron-donating groups and (b) the electron-withdrawing groups ( $\lambda_{\text{PL}}$  in unit of nm).

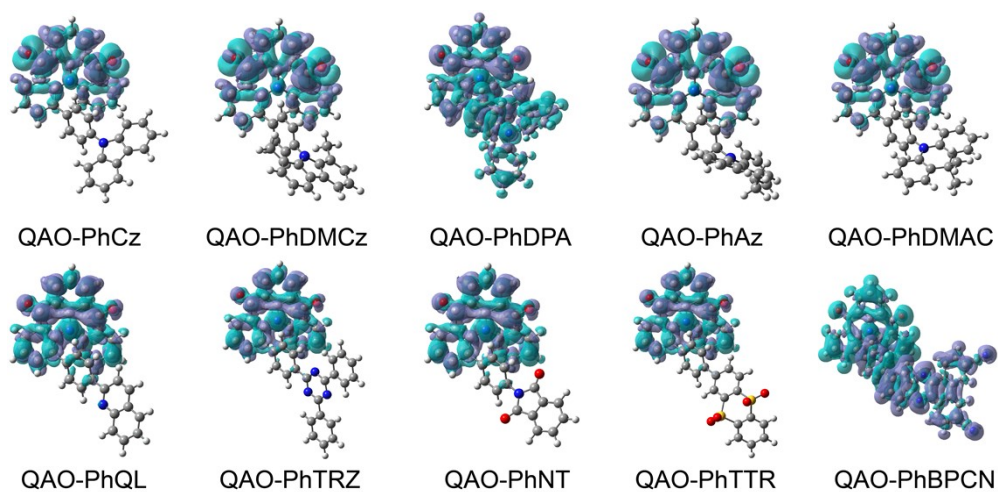

**Figure S4.** Charge density differences between the  $S_1$  and  $S_0$  of the investigated molecules.

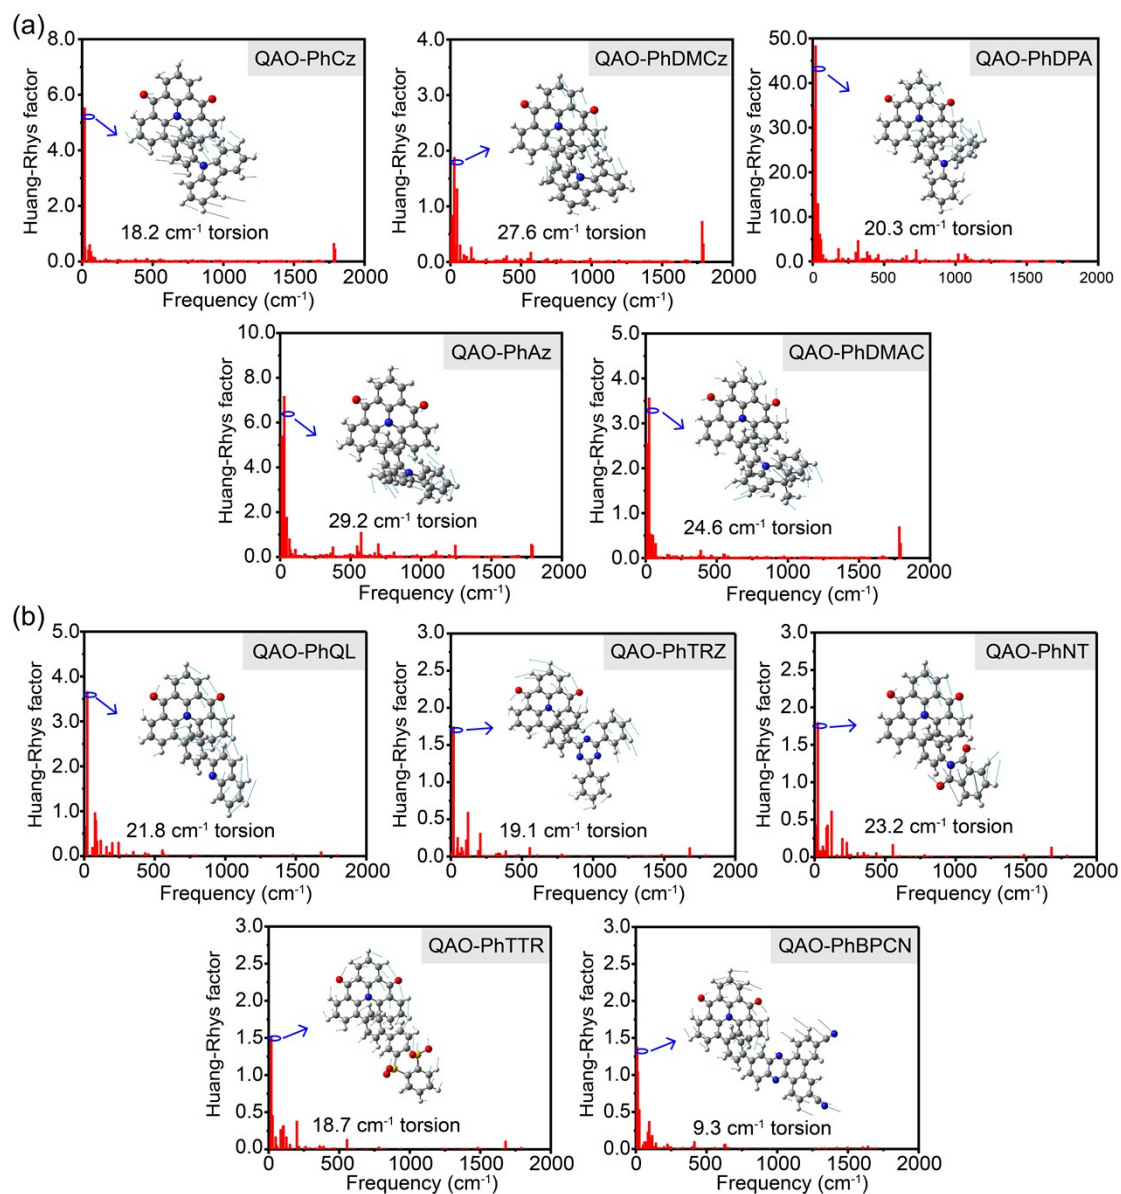

**Figure S5.** Calculated Huang-Rhys factors versus the normal mode frequencies for the investigated molecules with (a) the electron-donating groups and (b) the electron-withdrawing groups relevant to  $S_1 \rightarrow S_0$  process (The vibration modes with relatively large Huang-Rhys factors were shown as insets).

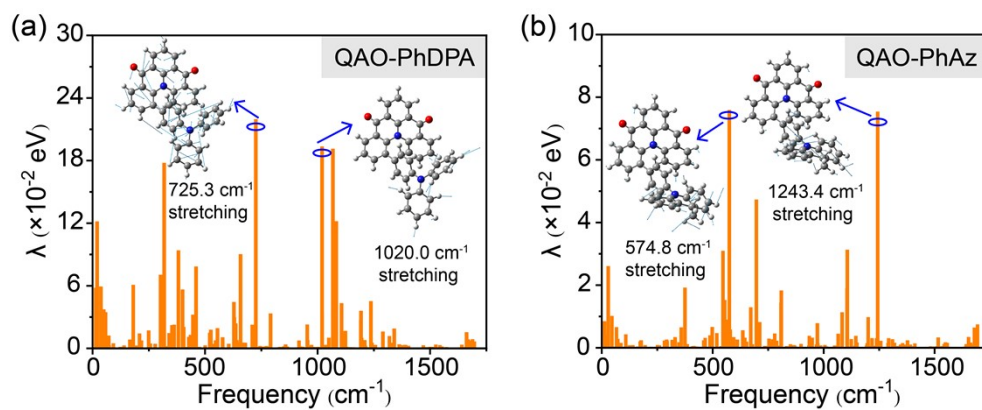

**Figure S6.** Calculated reorganization energies versus the normal-mode frequencies for (a) QAO-PhDPA and (b) QAO-PhAz (The representative vibration modes are shown as insets).

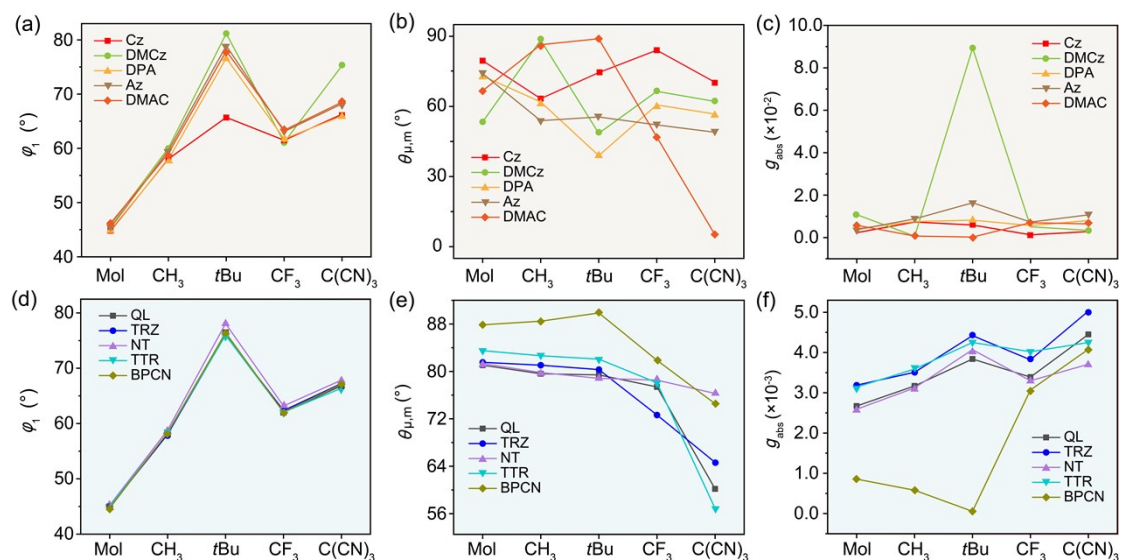

**Figure S7.** Calculated  $\varphi_1$ ,  $\theta_{\mu,m}$  and  $g_{abs}$  for the electron-donating- (a, b and c) and electron-withdrawing- (d, e and f) based molecules with introducing different steric hindrance groups.

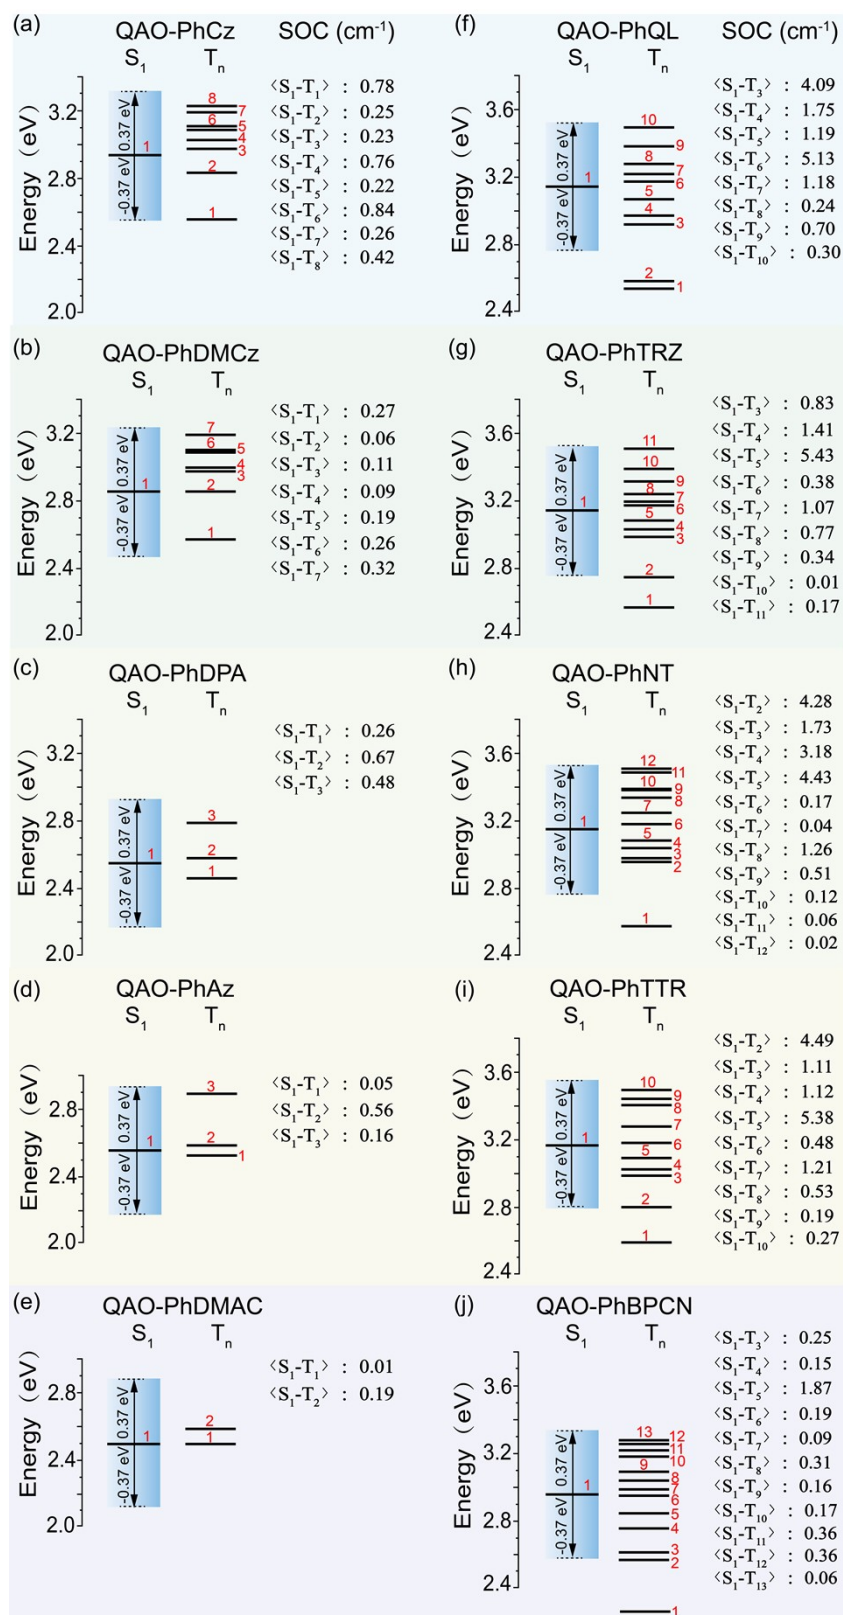

**Figure S8.** Calculated vertical excitation energies and the SOC constants between  $S_1$  and  $T_n$  states for (a) QAO-PhCz, (b) QAO-PhDMCz, (c) QAO-PhDPA, (d) QAO-PhAz, (e) QAO-PhDMAC, (f) QAO-PhOL, (g) QAO-PhTRZ, (h) QAO-PhNT, (i) QAO-PhTTR and (j) QAO-PhBPCN in toluene.



**Table S1.** Calculated HOMO energy levels, the maximum absorption ( $\lambda_{\text{abs}}$ ) and emission ( $\lambda_{\text{PL}}$ ) wavelengths of the experimental molecule QAO-PhCz with different DFT functionals.

| Computing method | HF (%) | HOMO (eV) | $\lambda_{\text{abs}} / \lambda_{\text{PL}}$ (nm) |
|------------------|--------|-----------|---------------------------------------------------|
| O3LYP            | 11.6   | -5.10     | 525 / 622                                         |
| B3LYP            | 20     | -5.42     | 457 / 512                                         |
| PBE0             | 25     | -5.68     | 422 / 497                                         |
| BMK              | 42     | -6.13     | 362 / 400                                         |
| M06-2X           | 54     | -6.66     | 349 / 385                                         |
| Exp.             | --     | -5.74     | 437 / 461                                         |

**Table S2.** Simulated excitation energy, transition compositions and characteristics of the molecules with electron-donating units using PBE0 and M062X functionals.

|            | PBE0               |                    |                   | M062X              |                                         |                   |
|------------|--------------------|--------------------|-------------------|--------------------|-----------------------------------------|-------------------|
|            | $\Delta E$<br>(eV) | Composition<br>(%) | Character         | $\Delta E$<br>(eV) | Composition<br>(%)                      | Character         |
| QAO-PhCz   | 2.94               | H→L(97.2)          | LRCT <sup>a</sup> | 3.56               | H-2→L(85.4);<br>H-1→L(4.7);<br>H→L(4.8) | SRCT <sup>b</sup> |
| QAO-PhDMCz | 2.86               | H→L(99.6)          | LRCT              | 3.56               | H-2→L(93.8)                             | SRCT              |
| QAO-PhDPA  | 2.56               | H→L(98.9)          | LRCT              | 3.47               | H→L(48.1);<br>H-1→L(47.4)               | LRCT              |
| QAO-PhAz   | 2.56               | H→L(99.4)          | LRCT              | 3.55               | H-1→L(88.5);<br>H→L(6.7)                | SRCT              |
| QAO-PhDMAC | 2.50               | H→L(99.5)          | LRCT              | 3.57               | H-1→L(94.3)                             | SRCT              |

<sup>a</sup> LRCT means long-range charge transfer; <sup>b</sup> SRCT means short-range charge transfer

**Table S3.** Calculated the maximum emission wavelengths ( $\lambda_{\text{PL}}$ ), transition compositions and reorganization energies ( $\lambda$ ,  $S_1 \rightarrow S_0$ ) of the investigated molecules.

| Compd.     | $\lambda_{\text{PL}}$<br>(nm) | Transition<br>compositions (%) | $\lambda$ (eV) |
|------------|-------------------------------|--------------------------------|----------------|
| QAO-PhCz   | 446                           | H-8→L(33.7); H-11→L(21.4);     | 0.32           |
| QAO-PhDMCz | 453                           | H-10→L(30.3); H-12→L(23.4);    | 0.38           |
| QAO-PhDPA  | 599                           | H→L(92.1); H-1→L(3.5);         | 3.05           |
| QAO-PhAz   | 509                           | H-8→L(29.1); H-10→L(24.9);     | 1.11           |
| QAO-PhDMAC | 532                           | H-9→L(22.8); H-12→L(22.4);     | 0.34           |
| QAO-PhQL   | 438                           | H→L(95.3); H-1→L(3.0)          | 0.21           |

|            |     |                       |      |
|------------|-----|-----------------------|------|
| QAO-PhTRZ  | 427 | H→L(98.3)             | 0.15 |
| QAO-PhNT   | 431 | H→L(98.3)             | 0.17 |
| QAO-PhTTR  | 425 | H→L(97.9)             | 0.15 |
| QAO-PhBPCN | 466 | H→L(89.3); H-1→L(8.9) | 0.15 |

**Table S4.** Calculated radiation rate ( $k_r$ ,  $s^{-1}$ ), nonradiative rate ( $k_{nr}$ ,  $s^{-1}$ ),  $\theta_{\mu,m}$ ,  $g_{PL}$  and  $FM$  of the investigated molecules modified with the steric hindrance groups.

| Compd.                        | $k_r$ ( $s^{-1}$ ) | $k_{nr}$ ( $s^{-1}$ ) | $\theta_{\mu,m}$ ( $^\circ$ ) | $g_{PL}$              | $FM$                   |
|-------------------------------|--------------------|-----------------------|-------------------------------|-----------------------|------------------------|
| QAO-PhCz-CH <sub>3</sub>      | $9.59 \times 10^5$ | $3.66 \times 10^7$    | 39.35                         | $1.38 \times 10^{-2}$ | $3.53 \times 10^{-4}$  |
| QAO-PhDMCz-CH <sub>3</sub>    | $6.58 \times 10^5$ | $5.22 \times 10^7$    | 82.36                         | $2.31 \times 10^{-3}$ | $2.88 \times 10^{-5}$  |
| QAO-PhDPA-CH <sub>3</sub>     | $1.26 \times 10^5$ | $3.20 \times 10^{10}$ | 36.86                         | $9.94 \times 10^{-3}$ | $3.93 \times 10^{-8}$  |
| QAO-PhAz-CH <sub>3</sub>      | $6.69 \times 10^5$ | $1.04 \times 10^7$    | 26.21                         | $1.81 \times 10^{-2}$ | $1.09 \times 10^{-3}$  |
| QAO-PhDMAC-CH <sub>3</sub>    | $4.43 \times 10^5$ | $8.82 \times 10^8$    | 18.49                         | $3.13 \times 10^{-2}$ | $1.57 \times 10^{-5}$  |
| QAO-PhQL-CH <sub>3</sub>      | $2.52 \times 10^7$ | $1.15 \times 10^8$    | 76.46                         | $3.01 \times 10^{-3}$ | $5.43 \times 10^{-4}$  |
| QAO-PhTRZ-CH <sub>3</sub>     | $2.58 \times 10^7$ | $3.27 \times 10^7$    | 79.36                         | $3.25 \times 10^{-3}$ | $1.43 \times 10^{-3}$  |
| QAO-PhNT-CH <sub>3</sub>      | $2.87 \times 10^7$ | $2.52 \times 10^5$    | 77.19                         | $2.91 \times 10^{-3}$ | $2.88 \times 10^{-3}$  |
| QAO-PhTTR-CH <sub>3</sub>     | $2.80 \times 10^7$ | $3.32 \times 10^7$    | 81.26                         | $3.39 \times 10^{-3}$ | $1.55 \times 10^{-3}$  |
| QAO-PhBPCN-CH <sub>3</sub>    | $3.22 \times 10^6$ | $1.33 \times 10^{10}$ | 88.16                         | $6.39 \times 10^{-4}$ | $1.55 \times 10^{-7}$  |
| QAO-PhCz- <i>t</i> Bu         | $5.38 \times 10^4$ | $5.35 \times 10^9$    | 83.72                         | $1.46 \times 10^{-3}$ | $1.47 \times 10^{-8}$  |
| QAO-PhDMCz- <i>t</i> Bu       | $5.63 \times 10^3$ | $1.19 \times 10^9$    | 81.16                         | $2.48 \times 10^{-3}$ | $1.17 \times 10^{-8}$  |
| QAO-PhDPA- <i>t</i> Bu        | $9.47 \times 10^6$ | $2.89 \times 10^{10}$ | 32.71                         | $8.34 \times 10^{-3}$ | $2.73 \times 10^{-6}$  |
| QAO-PhAz- <i>t</i> Bu         | $8.41 \times 10^4$ | $3.09 \times 10^9$    | 17.38                         | $1.64 \times 10^{-2}$ | $4.45 \times 10^{-7}$  |
| QAO-PhDMAC- <i>t</i> Bu       | $6.19 \times 10^3$ | $8.24 \times 10^8$    | 28.53                         | $1.29 \times 10^{-2}$ | $9.69 \times 10^{-8}$  |
| QAO-PhQL- <i>t</i> Bu         | $1.68 \times 10^7$ | $7.82 \times 10^8$    | 76.70                         | $3.71 \times 10^{-3}$ | $7.82 \times 10^{-5}$  |
| QAO-PhTRZ- <i>t</i> Bu        | $2.04 \times 10^7$ | $2.51 \times 10^7$    | 78.05                         | $4.37 \times 10^{-3}$ | $1.96 \times 10^{-3}$  |
| QAO-PhNT- <i>t</i> Bu         | $1.32 \times 10^7$ | $5.38 \times 10^{10}$ | 75.47                         | $4.05 \times 10^{-3}$ | $9.93 \times 10^{-7}$  |
| QAO-PhTTR- <i>t</i> Bu        | $2.37 \times 10^7$ | $2.99 \times 10^5$    | 80.05                         | $4.36 \times 10^{-3}$ | $4.31 \times 10^{-3}$  |
| QAO-PhBPCN- <i>t</i> Bu       | $1.17 \times 10^7$ | $8.35 \times 10^9$    | 89.33                         | $2.35 \times 10^{-4}$ | $3.30 \times 10^{-7}$  |
| QAO-PhCz-CF <sub>3</sub>      | $1.95 \times 10^4$ | $4.48 \times 10^{10}$ | 61.82                         | $6.74 \times 10^{-3}$ | $2.95 \times 10^{-9}$  |
| QAO-PhDMCz-CF <sub>3</sub>    | $9.75 \times 10^6$ | $4.70 \times 10^5$    | 61.05                         | $5.83 \times 10^{-3}$ | $5.56 \times 10^{-3}$  |
| QAO-PhDPA-CF <sub>3</sub>     | $9.84 \times 10^6$ | $4.37 \times 10^7$    | 45.85                         | $6.05 \times 10^{-3}$ | $1.11 \times 10^{-3}$  |
| QAO-PhAz-CF <sub>3</sub>      | $4.68 \times 10^5$ | $2.02 \times 10^9$    | 43.38                         | $2.49 \times 10^{-2}$ | $5.75 \times 10^{-6}$  |
| QAO-PhDMAC-CF <sub>3</sub>    | $2.08 \times 10^6$ | $1.75 \times 10^8$    | 23.81                         | $1.14 \times 10^{-2}$ | $1.34 \times 10^{-4}$  |
| QAO-PhQL-CF <sub>3</sub>      | $8.82 \times 10^5$ | $2.90 \times 10^{11}$ | 54.32                         | $8.08 \times 10^{-3}$ | $2.46 \times 10^{-8}$  |
| QAO-PhTRZ-CF <sub>3</sub>     | $8.11 \times 10^5$ | $7.01 \times 10^8$    | 70.52                         | $1.11 \times 10^{-2}$ | $1.28 \times 10^{-5}$  |
| QAO-PhNT-CF <sub>3</sub>      | $1.27 \times 10^2$ | $6.68 \times 10^6$    | 63.25                         | $2.89 \times 10^{-2}$ | $5.49 \times 10^{-7}$  |
| QAO-PhTTR-CF <sub>3</sub>     | $5.04 \times 10^4$ | $1.26 \times 10^{11}$ | 73.62                         | $8.79 \times 10^{-3}$ | $3.51 \times 10^{-9}$  |
| QAO-PhBPCN-CF <sub>3</sub>    | $3.15 \times 10^4$ | $2.17 \times 10^9$    | 87.42                         | $2.06 \times 10^{-3}$ | $3.00 \times 10^{-8}$  |
| QAO-PhCz-C(CN) <sub>3</sub>   | $1.03 \times 10^6$ | $1.71 \times 10^{11}$ | 79.03                         | $3.49 \times 10^{-3}$ | $2.11 \times 10^{-8}$  |
| QAO-PhDMCz-C(CN) <sub>3</sub> | $2.43 \times 10^3$ | $8.79 \times 10^{10}$ | 89.64                         | $9.11 \times 10^{-4}$ | $2.52 \times 10^{-11}$ |

|                               |                      |                       |       |                       |                        |
|-------------------------------|----------------------|-----------------------|-------|-----------------------|------------------------|
| QAO-PhDPA-C(CN) <sub>3</sub>  | 4.50×10 <sup>5</sup> | 1.74×10 <sup>11</sup> | 59.07 | 5.31×10 <sup>-3</sup> | 1.38×10 <sup>-8</sup>  |
| QAO-PhAz-C(CN) <sub>3</sub>   | 1.72×10 <sup>6</sup> | 2.90×10 <sup>8</sup>  | 42.85 | 6.20×10 <sup>-2</sup> | 3.64×10 <sup>-4</sup>  |
| QAO-PhDMAC-C(CN) <sub>3</sub> | 1.99×10 <sup>3</sup> | 3.97×10 <sup>10</sup> | 45.19 | 4.46×10 <sup>-2</sup> | 2.23×10 <sup>-9</sup>  |
| QAO-PhQL-C(CN) <sub>3</sub>   | 6.37×10 <sup>4</sup> | 8.81×10 <sup>10</sup> | 78.15 | 4.35×10 <sup>-3</sup> | 3.15×10 <sup>-9</sup>  |
| QAO-PhTRZ-C(CN) <sub>3</sub>  | 3.58×10 <sup>4</sup> | 7.49×10 <sup>10</sup> | 70.49 | 9.57×10 <sup>-3</sup> | 4.57×10 <sup>-9</sup>  |
| QAO-PhNT-C(CN) <sub>3</sub>   | 6.59×10 <sup>2</sup> | 2.43×10 <sup>8</sup>  | 53.47 | 2.94×10 <sup>-2</sup> | 7.99×10 <sup>-8</sup>  |
| QAO-PhTTR-C(CN) <sub>3</sub>  | 1.44×10 <sup>4</sup> | 5.65×10 <sup>10</sup> | 88.07 | 1.13×10 <sup>-3</sup> | 2.87×10 <sup>-10</sup> |
| QAO-PhBPCN-C(CN) <sub>3</sub> | 1.65×10 <sup>4</sup> | 3.18×10 <sup>10</sup> | 77.35 | 7.08×10 <sup>-3</sup> | 3.68×10 <sup>-9</sup>  |

**Table S5.** Summary of the PLQY, |g<sub>PL</sub>| and *FM* values of the reported CP-MR-TADF materials.

| Compd.                                                                              | g <sub>PL</sub>       | PLQY | <i>FM</i>            | Year | Reference |
|-------------------------------------------------------------------------------------|-----------------------|------|----------------------|------|-----------|
| 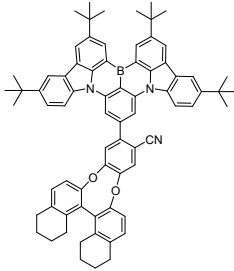  | 9.1×10 <sup>-4</sup>  | 99%  | 9.0×10 <sup>-4</sup> | 2021 | 1         |
| OBN-2CN-BN                                                                          |                       |      |                      |      |           |
|  | 10.4×10 <sup>-4</sup> | 95%  | 9.9×10 <sup>-4</sup> | 2021 | 2         |
| OBN-4CN-BN                                                                          |                       |      |                      |      |           |
|  | 1.0×10 <sup>-3</sup>  | 88%  | 8.8×10 <sup>-4</sup> | 2021 | 2         |
| BN-4                                                                                |                       |      |                      |      |           |
|  | 1.0×10 <sup>-3</sup>  | 87%  | 8.7×10 <sup>-4</sup> | 2021 |           |
| BN-5                                                                                |                       |      |                      |      |           |

|                                                                                                                 |                      |      |                      |      |   |
|-----------------------------------------------------------------------------------------------------------------|----------------------|------|----------------------|------|---|
| 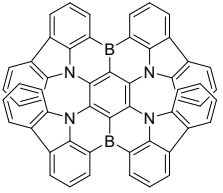 <p><b>1a</b></p>              | $2.0 \times 10^{-3}$ | 100% | $2.0 \times 10^{-3}$ | 2021 |   |
|  <p><b>1b</b></p>              | $2.0 \times 10^{-3}$ | 99%  | $2.0 \times 10^{-3}$ | 2021 | 3 |
|  <p><b>1c</b></p>             | $2.0 \times 10^{-3}$ | 90%  | $1.8 \times 10^{-3}$ | 2021 |   |
|  <p><b>QAO-<br/>PhCz</b></p> | $1.1 \times 10^{-3}$ | 47%  | $5.2 \times 10^{-4}$ | 2021 | 4 |
|  <p><b>BN-MelAC</b></p>      | $3.2 \times 10^{-4}$ | 96%  | $3.1 \times 10^{-4}$ | 2022 | 5 |
|  <p><b>helicene-BN</b></p>   | $2.1 \times 10^{-3}$ | 98%  | $2.0 \times 10^{-3}$ | 2022 | 6 |
|  <p><b>Hel-DiDikta</b></p>   | $4.0 \times 10^{-4}$ | 4.1% | $1.6 \times 10^{-5}$ | 2022 | 7 |

---

|                                                                                                           |                       |     |                      |      |   |
|-----------------------------------------------------------------------------------------------------------|-----------------------|-----|----------------------|------|---|
| 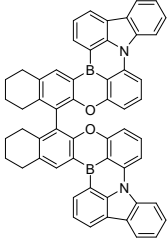 <p>DOBN</p>             | $1.0 \times 10^{-3}$  | 91% | $9.1 \times 10^{-4}$ | 2022 | 8 |
|  <p>DOBNT</p>            | $0.9 \times 10^{-3}$  | 96% | $8.6 \times 10^{-4}$ | 2022 |   |
|  <p>Czp-<br/>tBuCzB</p> | $0.54 \times 10^{-3}$ | 98% | $5.3 \times 10^{-4}$ | 2023 | 9 |
|  <p>Czp-<br/>POAB</p>  | $0.48 \times 10^{-3}$ | 93% | $4.5 \times 10^{-4}$ | 2023 |   |

## Notes and references

- (1) Xu, Y.; Wang, Q.; Cai, X.; Li, C.; Wang, Y. Highly Efficient Electroluminescence from Narrowband Green Circularly Polarized Multiple Resonance Thermally Activated Delayed Fluorescence Enantiomers. *Adv. Mater.* **2021**, *33*, 2100652.
- (2) Wu, X.; Huang, J.-W.; Su, B.-K.; Wang, S.; Yuan, L.; Zheng, W.-Q.; Zhang, H.; Zheng, Y.-X.; Zhu, W.; Chou, P.-T. Fabrication of Circularly Polarized MR-TADF Emitters with Asymmetrical Peripheral-Lock Enhancing Helical B/N-Doped Nanographenes. *Adv. Mater.* **2022**, *34*, 2105080.
- (3) Li, J.-K.; Chen, X.-Y.; Guo, Y.-L.; Wang, X.-C.; Sue, A. C. H.; Cao, X.-Y.; Wang, X.-Y. B,N-Embedded Double Hetero[7]helicenes with Strong Chiroptical Responses in the Visible Light Region. *J. Am. Chem. Soc.* **2021**, *143*, 17958-17963.
- (4) Yang, S.-Y.; Zou, S.-N.; Kong, F.-C.; Liao, X.-J.; Qu, Y.-K.; Feng, Z.-Q.; Zheng, Y.-X.; Jiang, Z.-Q.; Liao, L.-S. A narrowband blue circularly polarized thermally activated delayed fluorescence emitter with a hetero-helicene structure. *Chem. Commun.* **2021**, *57*, 11041-11044.
- (5) Yang, Y.; Li, N.; Miao, J.; Cao, X.; Ying, A.; Pan, K.; Lv, X.; Ni, F.; Huang, Z.; Gong, S.; et al.

Chiral Multi-Resonance TADF Emitters Exhibiting Narrowband Circularly Polarized Electroluminescence with an EQE of 37.2%. *Angew. Chem., Int. Ed.* **2022**, *61*, e202202227.

(6) Yang, W.; Li, N.; Miao, J.; Zhan, L.; Gong, S.; Huang, Z.; Yang, C. Simple Double Hetero[5]helicenes Realize Highly Efficient and Narrowband Circularly Polarized Organic Light-Emitting Diodes. *CCS Chemistry*. **2022**, *4*, 3463-3471.

(7) dos Santos, J. M.; Sun, D.; Moreno-Naranjo, J. M.; Hall, D.; Zinna, F.; Ryan, S. T. J.; Shi, W.; Matulaitis, T.; Cordes, D. B.; Slawin, A. M. Z.; et al. An S-shaped double helicene showing both multi-resonance thermally activated delayed fluorescence and circularly polarized luminescence. *J. Mater. Chem. C*. **2022**, *10*, 4861-4870.

(8) Yan, Z.-P.; Yuan, L.; Zhang, Y.; Mao, M.-X.; Liao, X.-J.; Ni, H.-X.; Wang, Z.-H.; An, Z.; Zheng, Y.-X.; Zuo, J.-L. A Chiral Dual-Core Organoboron Structure Realizes Dual-Channel Enhanced Ultrapure Blue Emission and Highly Efficient Circularly Polarized Electroluminescence. *Adv. Mater.* **2022**, *34*, 2204253.

(9) Liao, X.-J.; Pu, D.; Yuan, L.; Tong, J.; Xing, S.; Tu, Z.-L.; Zuo, J.-L.; Zheng, W.-H.; Zheng, Y.-X. Planar Chiral Multiple Resonance Thermally Activated Delayed Fluorescence Materials for Efficient Circularly Polarized Electroluminescence. *Angew. Chem., Int. Ed.* **2023**, *62*, e202217045.
